# Supplementary material for: Solution-processed OLEDs based on phosphorescent PtAu2 complexes with phenothiazine-functionalized acetylides
Source: Royal Society of Chemistry journal article supplement (doi:10.1039/c6tc01539e), 2016-01-01
Supplement: c6tc01539e1.pdf [file c6tc01539e1.pdf]

# Electronic Supporting Information

## **Solution-processed OLEDs Based on Phosphorescent PtAu<sub>2</sub> Complexes with Phenothiazine-functionalized Acetylides**

Xian-Chong Zeng,<sup>a,b</sup> Jin-Yun Wang,<sup>a</sup> Liang-Jin Xu,<sup>a</sup> Hui-Min Wen<sup>\*,a</sup> and  
Zhong-Ning Chen<sup>\*a,b</sup>

<sup>a</sup> *State Key Laboratory of Structural Chemistry, Fujian Institute of Research on the Structure of Matter, Chinese Academy of Sciences, Fuzhou, Fujian 350002, China. E-mail: czn@fjirsm.ac.cn.*

<sup>b</sup> *College of Chemistry, Fuzhou University, Fuzhou, Fujian 350002, China.*

**Table S1.** Crystallographic data for 2·3CH<sub>2</sub>Cl<sub>2</sub>.

|                                          |                                                                                                                                |
|------------------------------------------|--------------------------------------------------------------------------------------------------------------------------------|
| empirical formula                        | C <sub>107</sub> H <sub>88</sub> Au <sub>2</sub> Cl <sub>8</sub> N <sub>2</sub> O <sub>8</sub> P <sub>6</sub> PtS <sub>2</sub> |
| formula weight                           | 2652.36                                                                                                                        |
| crystal system                           | triclinic                                                                                                                      |
| space group                              | $P \bar{1}$                                                                                                                    |
| $a$ , Å                                  | 12.7978(1)                                                                                                                     |
| $b$ , Å                                  | 14.9854(3)                                                                                                                     |
| $c$ , Å                                  | 16.8833(3)                                                                                                                     |
| $\alpha$ , deg                           | 84.385(8)                                                                                                                      |
| $\beta$ , deg                            | 74.318(8)                                                                                                                      |
| $\gamma$ , deg                           | 70.229(7)                                                                                                                      |
| $V$ , Å <sup>3</sup>                     | 2933.52(8)                                                                                                                     |
| $Z$                                      | 1                                                                                                                              |
| $\rho_{\text{calcd}}$ g/cm <sup>-3</sup> | 1.501                                                                                                                          |
| $\mu$ , mm <sup>-1</sup>                 | 4.034                                                                                                                          |
| radiation ( $\lambda$ , Å)               | 0.71073                                                                                                                        |
| temp,(K)                                 | 293(2)                                                                                                                         |
| R1 ( $F_o$ ) <sup>a</sup>                | 0.0489                                                                                                                         |
| wR2 ( $F_o^2$ ) <sup>b</sup>             | 0.1440                                                                                                                         |
| GOF                                      | 0.995                                                                                                                          |

<sup>a</sup>  $R1 = \Sigma|F_o - F_c|/\Sigma F_o$

<sup>b</sup>  $wR2 = \Sigma[w(F_o^2 - F_c^2)^2]/\Sigma[w(F_o^2)]^{1/2}$

**Table S2.** The partial molecular orbital compositions (%) and the absorption transitions for complex **1** in CH<sub>2</sub>Cl<sub>2</sub> media calculated by TD-DFT method at the PBE1PBE level.

| orbital | energy (eV) | MO contribution (%) |                  |       |            |
|---------|-------------|---------------------|------------------|-------|------------|
|         |             | Pt (s/p/d)          | Au (s/p/d)       | dpmp  | C≡C-PTZ-Et |
| LUMO+7  | -1.37       | 13.58 (0/100/0)     | 9.41 (34/51/15)  | 63.07 | 13.94      |
| LUMO+4  | -1.49       | 3.48 (0/100/0)      | 3.31 (29/37/34)  | 89.96 | 3.25       |
| LUMO+2  | -1.64       | 2.17 (0/100/0)      | 10.70 (21/64/15) | 83.69 | 3.44       |
| LUMO    | -2.50       | 14.16 (0/100/0)     | 22.87 (61/30/9)  | 53.93 | 9.04       |
| HOMO    | -5.47       | 5.29 (5/0/95)       | 0.59 (55/20/25)  | 1.27  | 92.85      |
| HOMO-2  | -6.53       | 13.70 (3/0/97)      | 2.41 (58/7/35)   | 3.27  | 80.61      |
| HOMO-3  | -6.65       | 34.22 (22/0/78)     | 38.58 (36/10/54) | 25.58 | 1.63       |

| states         | <i>E</i> , nm (eV) | O.S.   | transition (Contrib.)                  | assignment                                                                                                   | exp. (nm) |
|----------------|--------------------|--------|----------------------------------------|--------------------------------------------------------------------------------------------------------------|-----------|
| S <sub>1</sub> | 509 (2.44)         | 0.5101 | HOMO→LUMO (97%)                        | <sup>1</sup> LLCT/ <sup>1</sup> LMCT                                                                         | 479       |
| S <sub>4</sub> | 374 (3.32)         | 0.2143 | HOMO→LUMO+2 (57%)<br>HOMO-3→LUMO (16%) | <sup>1</sup> LLCT/ <sup>1</sup> LMCT<br><sup>1</sup> MC/ <sup>1</sup> MLCT/ <sup>1</sup> IL                  |           |
| S <sub>5</sub> | 370 (3.35)         | 0.4991 | HOMO-3→LUMO (71%)<br>HOMO→LUMO+2 (15%) | <sup>1</sup> MC/ <sup>1</sup> MLCT/ <sup>1</sup> IL<br><sup>1</sup> LLCT/ <sup>1</sup> LMCT                  | 382       |
| S <sub>7</sub> | 365 (3.40)         | 0.313  | HOMO-2→LUMO (74%)<br>HOMO-3→LUMO (11%) | <sup>1</sup> LLCT/ <sup>1</sup> LMCT/ <sup>1</sup> MC<br><sup>1</sup> MC/ <sup>1</sup> MLCT/ <sup>1</sup> IL |           |

**Table S3.** The partial molecular orbital compositions (%) and the emission transition for complex **1** in CH<sub>2</sub>Cl<sub>2</sub> media calculated by TD-DFT method at the PBE1PBE level.

| orbital | energy (eV) | MO contribution (%) |                  |       |            |
|---------|-------------|---------------------|------------------|-------|------------|
|         |             | Pt (s/p/d)          | Au (s/p/d)       | dpmp  | C≡C-PTZ-Et |
| LUMO    | -2.72       | 16.07 (0/100/0)     | 25.51 (68/22/10) | 49.85 | 8.57       |
| HOMO    | -5.31       | 4.57 (2/0/98)       | 0.57 (54/24/23)  | 1.18  | 93.69      |

  

| states         | <i>E</i> , nm (eV) | O.S.   | transition (contrib.) | assignment                           | exp. (nm) |
|----------------|--------------------|--------|-----------------------|--------------------------------------|-----------|
| T <sub>1</sub> | 672 (1.84)         | 0.0000 | HOMO→LUMO (83%)       | <sup>3</sup> LLCT/ <sup>3</sup> LMCT | 683       |

**Table S4.** The partial molecular orbital compositions (%) and the absorption transitions for complex **2** in CH<sub>2</sub>Cl<sub>2</sub> media calculated by TD-DFT method at the PBE1PBE level.

| orbital | energy (eV) | MO contribution (%) |                  |       |                                       |
|---------|-------------|---------------------|------------------|-------|---------------------------------------|
|         |             | Pt (s/p/d)          | Au (s/p/d)       | dpmp  | C≡CC <sub>6</sub> H <sub>4</sub> -PTZ |
| LUMO+7  | -1.45       | 10.84 (0/97/3)      | 8.81 (42/42/16)  | 63.30 | 17.05                                 |
| LUMO+4  | -1.55       | 4.61 (6/55/39)      | 5.17 (34/44/22)  | 85.17 | 5.05                                  |
| LUMO    | -2.61       | 14.96 (0/99/0)      | 24.06 (62/30/9)  | 50.25 | 10.73                                 |
| HOMO    | -5.71       | 0.20 (30/7/63)      | 0.13 (73/15/12)  | 0.09  | 99.58                                 |
| HOMO-2  | -6.52       | 25.77 (10/0/90)     | 2.40 (57/17/26)  | 3.17  | 68.66                                 |
| HOMO-3  | -6.72       | 34.02 (22/0/78)     | 38.97 (37/10/53) | 25.92 | 1.09                                  |

| states         | <i>E</i> , nm (eV) | O.S.   | transition (Contrib.) | assignment                                            | exp. (nm) |
|----------------|--------------------|--------|-----------------------|-------------------------------------------------------|-----------|
| S <sub>1</sub> | 460 (2.70)         | 0.0392 | HOMO→LUMO (97%)       | <sup>1</sup> LLCT/ <sup>1</sup> LMCT/ <sup>1</sup> IL | 448       |
| S <sub>3</sub> | 393 (3.15)         | 0.4982 | HOMO-2→LUMO (96%)     | <sup>1</sup> LLCT/ <sup>1</sup> MC/ <sup>1</sup> LMCT | 382       |
| S <sub>4</sub> | 374 (3.32)         | 0.6567 | HOMO-3→LUMO (98%)     | <sup>1</sup> MC/ <sup>1</sup> MLCT/ <sup>1</sup> IL   |           |

**Table S5.** The partial molecular orbital compositions (%) and the emission transition for complex **2** in CH<sub>2</sub>Cl<sub>2</sub> media calculated by TD-DFT method at the PBE1PBE level.

| orbital | energy (eV) | MO contribution (%) |                  |       |                                       |
|---------|-------------|---------------------|------------------|-------|---------------------------------------|
|         |             | Pt (s/p/d)          | Au (s/p/d)       | dpmp  | C≡CC <sub>6</sub> H <sub>4</sub> -PTZ |
| LUMO    | -2.88       | 16.50 (0/100/0)     | 25.87 (67/22/10) | 48.12 | 9.51                                  |
| HOMO    | -5.52       | 0.10 (83/2/15)      | 0.07 (90/9/1)    | 0.06  | 99.76                                 |

  

| state          | <i>E</i> , nm (eV) | O.S.   | transition (contrib.) | assignment                           | exp. (nm) |
|----------------|--------------------|--------|-----------------------|--------------------------------------|-----------|
| T <sub>1</sub> | 610 (2.03)         | 0.0000 | HOMO→LUMO (95%)       | <sup>3</sup> LLCT/ <sup>3</sup> LMCT | 572       |

**Table S6.** Optimization of electroluminescent performance of OLEDs based on complex **1**.

| dopant   | host                        | doping (%) | $\lambda_{EL}$ (nm) | $V_{on}$ (V) | $L_{max}$ (cd m <sup>-2</sup> ) | $CE_{max}$ (cd A <sup>-1</sup> ) | $PE_{max}$ (lm W <sup>-1</sup> ) | $EQE^a$ (%) | $EQE^b$ (%) |
|----------|-----------------------------|------------|---------------------|--------------|---------------------------------|----------------------------------|----------------------------------|-------------|-------------|
| <b>1</b> | TAPC                        | 8          | 595                 | 5.60         | 1402                            | 14.4                             | 5.3                              | 6.7         | 2.1         |
| <b>1</b> | TAPC : OXD-7<br>(48% : 47%) | 5          | 605                 | 5.05         | 6263                            | 16.4                             | 5.8                              | 7.6         | 7.2         |
| <b>1</b> | TAPC : OXD-7<br>(46% : 46%) | 8          | 605                 | 4.50         | 10446                           | 35.4                             | 16.8                             | 18.7        | 16.9        |
| <b>1</b> | TCTA : OXD-7<br>(46% : 46%) | 8          | 606                 | 4.85         | 8594                            | 25.8                             | 12.0                             | 13.1        | 11.8        |
| <b>1</b> | mCP : OXD-7<br>(46% : 46%)  | 8          | 605                 | 5.65         | 3112                            | 3.7                              | 1.4                              | 2.0         | 1.7         |
| <b>2</b> | TCTA : OXD-7<br>(46% : 46%) | 8          | 568                 | 4.95         | 8975                            | 21.7                             | 9.7                              | 8.0         | 6.9         |
| <b>2</b> | TAPC : OXD-7<br>(46% : 46%) | 8          | 568                 | 4.60         | 3940                            | 20.0                             | 10.2                             | 7.1         | 5.6         |

<sup>a</sup> The highest external quantum efficiency. <sup>b</sup> External quantum efficiency at brightness of 1000 cd m<sup>-2</sup>.

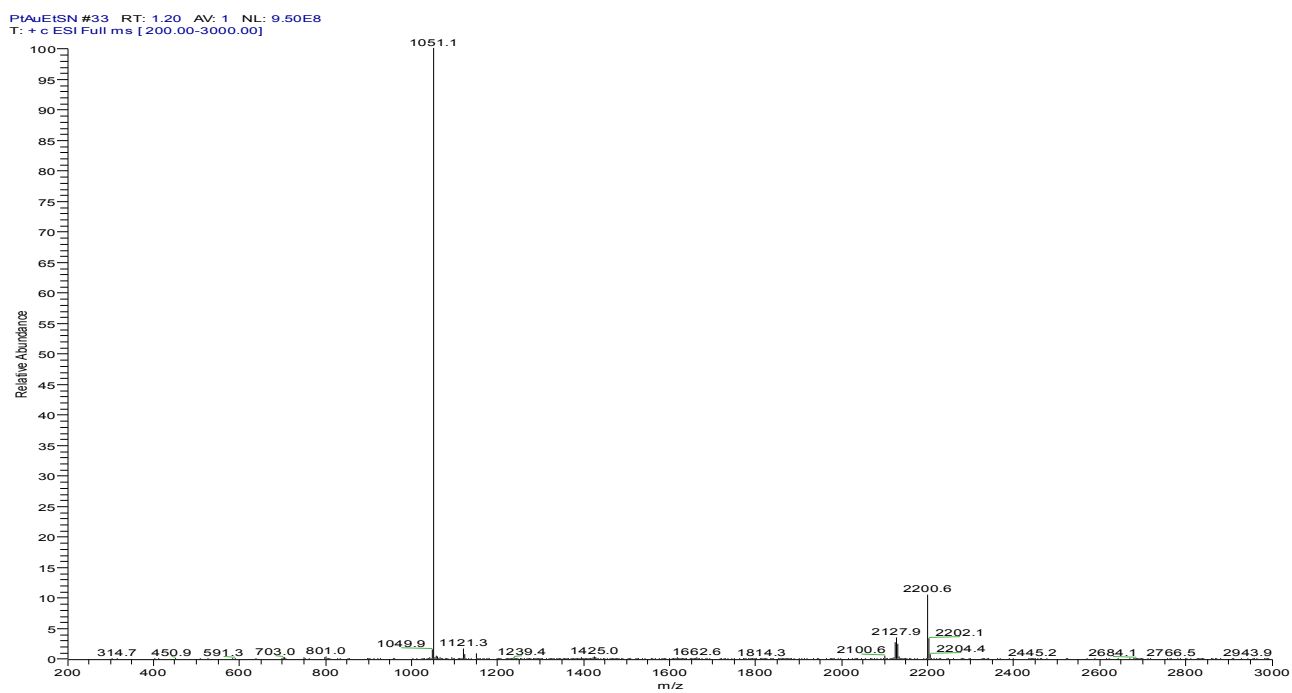

**Figure S1.** The ESI-MS of complex 1.

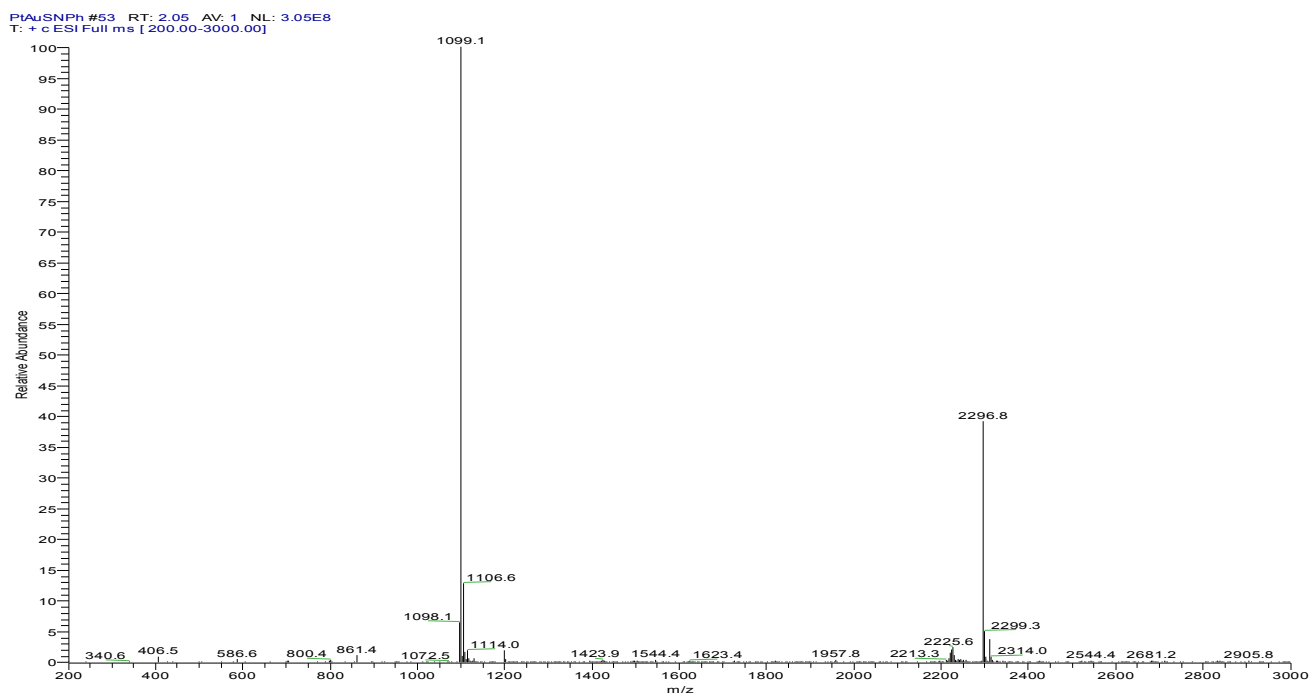

**Figure S2.** The ESI-MS of complex 2.

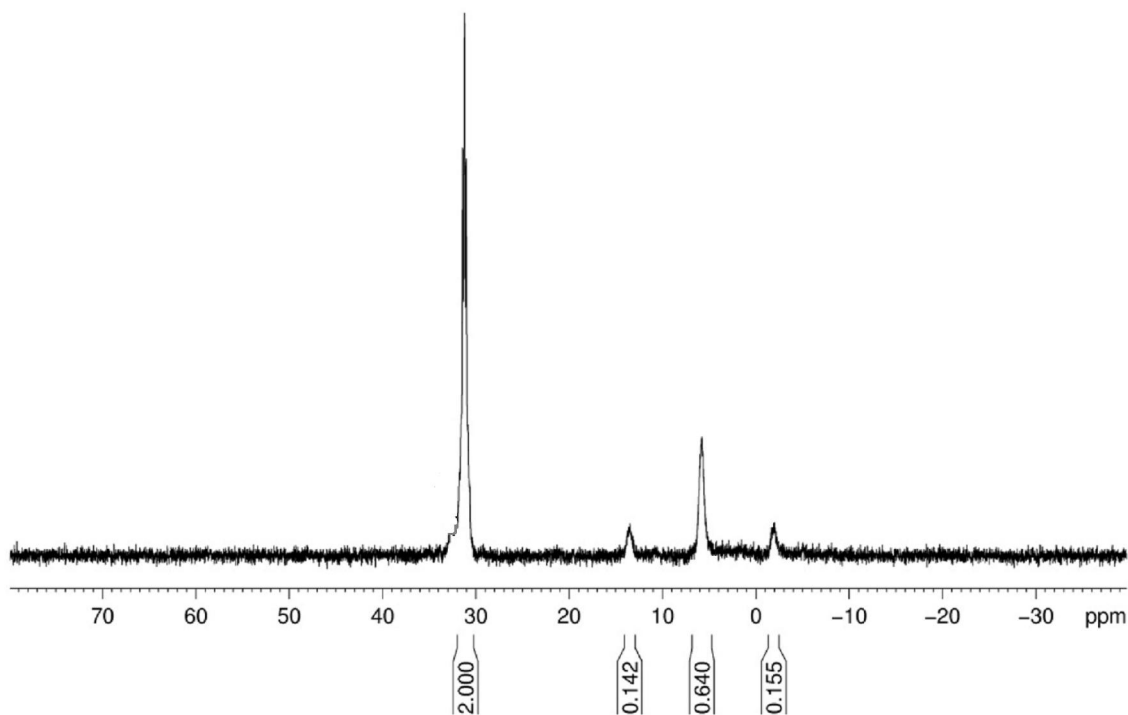

**Figure S3.** The  $^{31}\text{P}$  NMR spectrum of complex 1.

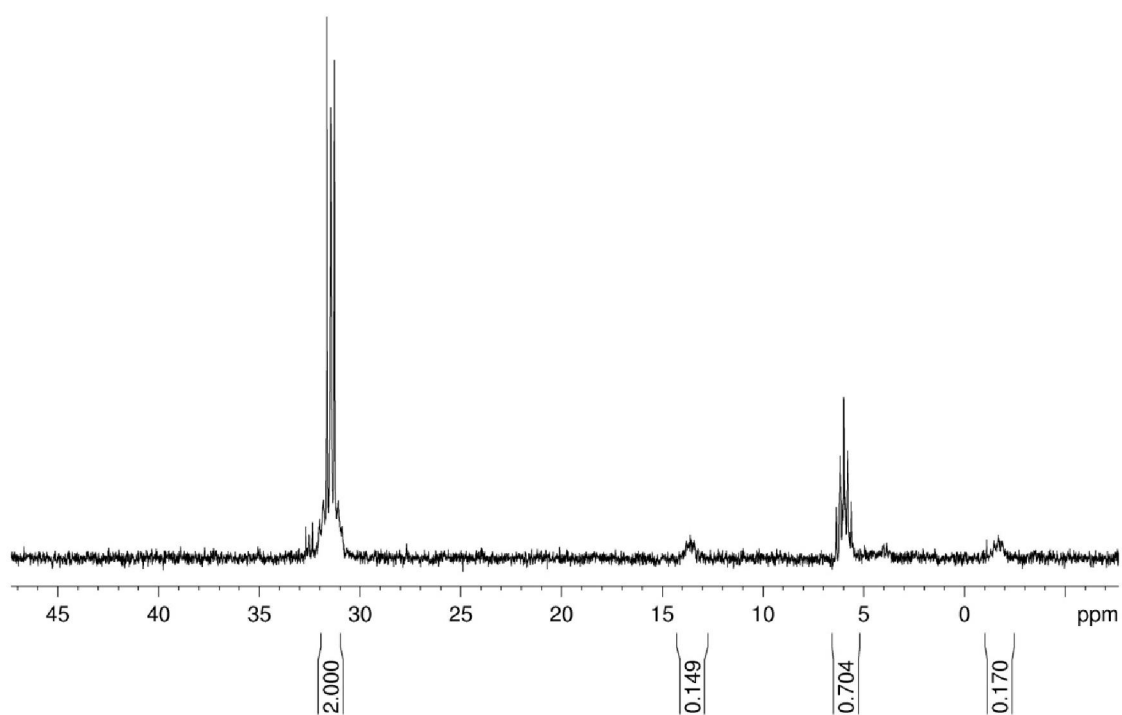

**Figure S4.** The  $^{31}\text{P}$  NMR spectrum of complex 2.

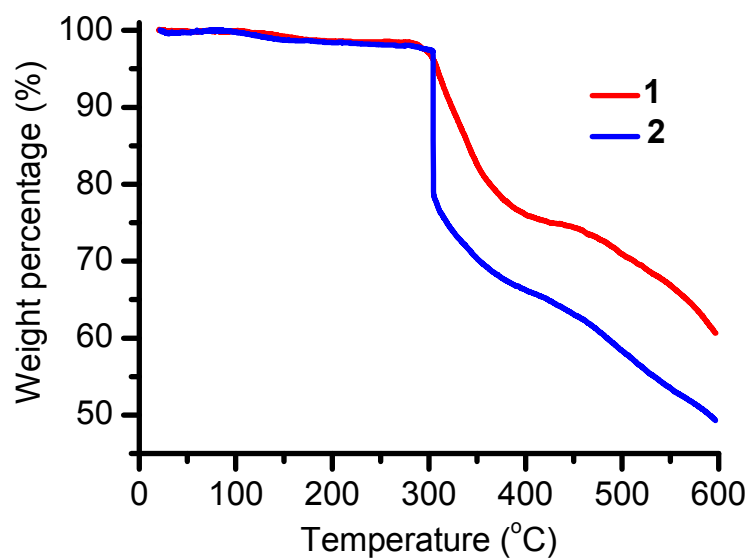

**Figure S5.** Plots of thermogravimetric analysis for complexes **1** and **2** in temperature range 25-600 °C.

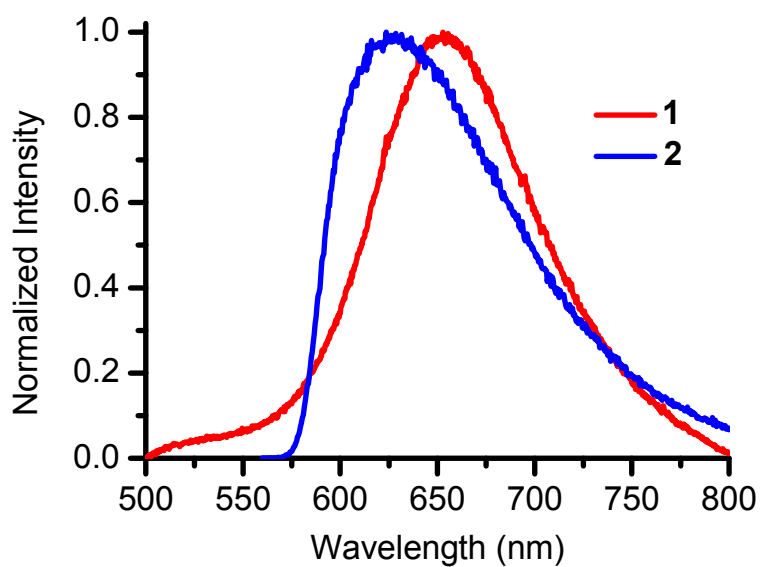

**Figure S6.** The emission spectra of complexes **1** and **2** in powder state.



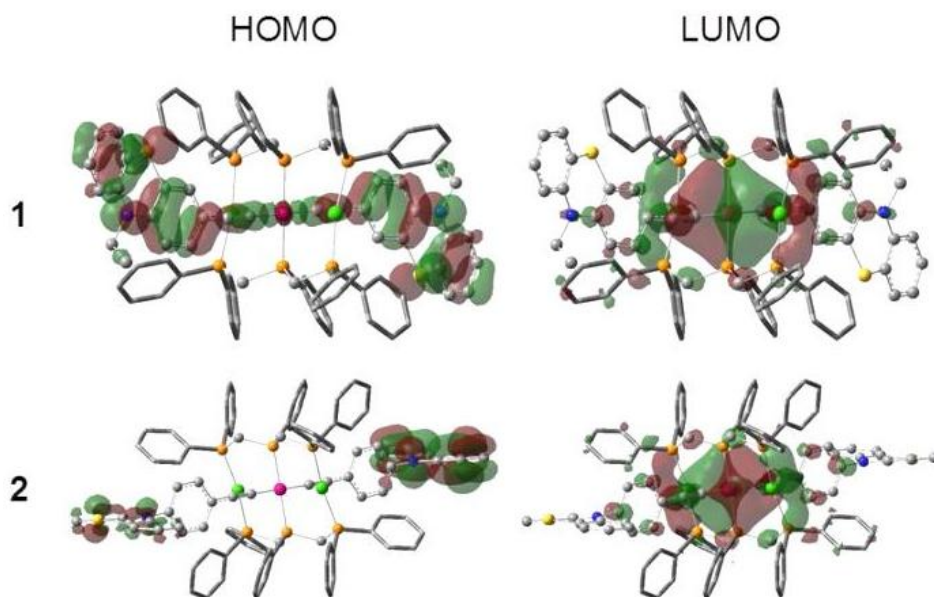

**Figure S7.** The HOMO and LUMO plots (isovalue = 0.025) of complexes **1** and **2** in the triplet states from TD-DFT studies

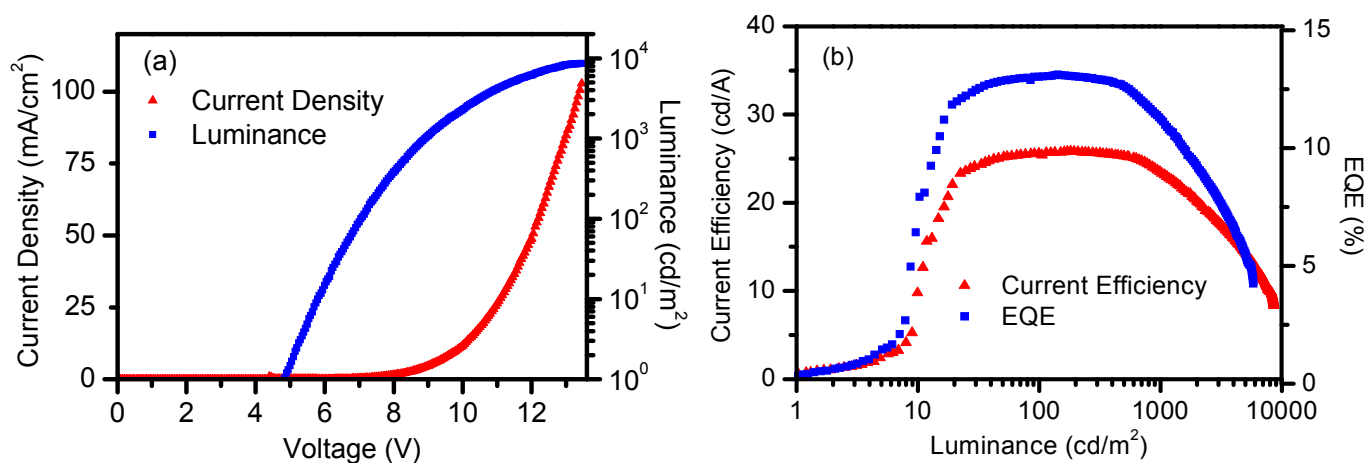

**Figure S8.** (a) Current density-voltage-luminance (J-V-L) characteristics. (b) Current efficiency/external quantum efficiency vs luminance for the device of complex **1** using 46% TCTA and 46% OXD-7 as a blended host.

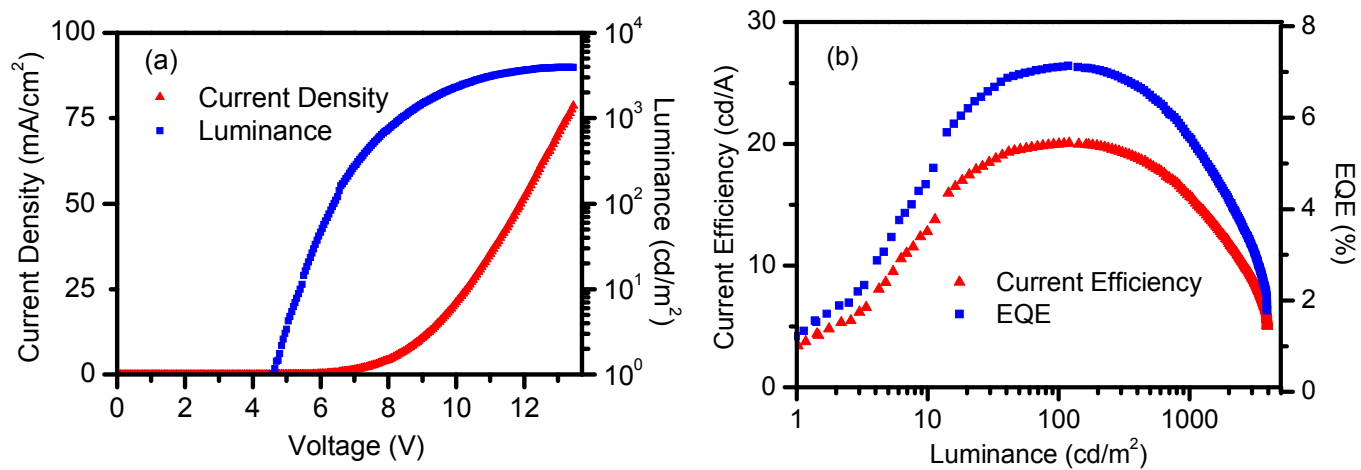

**Figure S9.** (a) Current density-voltage-luminance (J-V-L) characteristics. (b) Current efficiency\external quantum efficiency vs luminance for the device of complex **2** using 46% TAPC and 46% OXD-7 as a blended host.
